# Supplementary material for: Graphitic carbon cage structure encapsulating cobalt nanoparticles in nitrogen-doped biomass-derived carbon materials enables high-performance sodium–sulfur batteries
Source: Royal Society of Chemistry journal article supplement (doi:10.1039/d5ta06395g), 2025-01-01
Supplement: d5ta06395g1.pdf [file d5ta06395g1.pdf]

# **Graphitic Carbon Cage Structure Encapsulating Cobalt Nanoparticles in Nitrogen-doped Biomass-derived Carbon Materials Enables High-performance Sodium-sulfur Batteries**

Minghui Zhang <sup>a,1</sup>, Shengrui Cui <sup>a,1</sup>, Youjun Xing <sup>a</sup>, Kang Dong <sup>a</sup>, Haoran Li <sup>a</sup>, Yilian Song <sup>a</sup>, Yukui Wang <sup>a</sup>, Dingyi Yu <sup>a</sup>, Zengqi Zhang <sup>b,\*</sup>, Seung-Taek Myung <sup>c,\*</sup>,  
Yongcheng Jin <sup>a,\*</sup>

<sup>a</sup> School of Materials Science and Engineering, Ocean University of China, Qingdao 266100, Shandong

<sup>b</sup> Qingdao Industrial Energy Storage Research Institute, Qingdao Institute of Bioenergy and Bioprocess Technology, Chinese Academy of Science, Qingdao 266101, China

<sup>c</sup> Department of Nanotechnology & Advanced Materials Engineering, Sejong University, Seoul 143-747, South Korea

\* E-mail of corresponding authors: [zhangzq@qibebt.ac.cn](mailto:zhangzq@qibebt.ac.cn) (Zengqi Zhang); [smyung@sejong.ac.kr](mailto:smyung@sejong.ac.kr) (Seung-Taek Myung); [jinyongcheng@ouc.edu.cn](mailto:jinyongcheng@ouc.edu.cn) (Yongcheng Jin)

## **1. Experimental**

### **1.1. Sample preparation**

The pine nut shells (Purchased in Hei Longjiang province of China) were first washed with up water and dried at 80 °C overnight in an oven. The dry pine nut shells were oxidized at 300 °C for 3 h in a muffle furnace, and then grind them into powder. The obtained product is the precursor of pine nut shell microporous carbon (PN). PN and K<sub>3</sub>[Co(CN)]<sub>6</sub> (99%, Aladdin) were uniformly dispersed in 50 ml of 1 M KOH (≥ 85.0%, GR) solution with a mass ratio of 1:1 and stirred quickly for 12 h. Then, freeze-dried to remove the moisture. The obtained sample was heated at 200 °C for 1.5 h, 700 °C for 3 h in a tube furnace at a heating rate of 5 °C min<sup>-1</sup> under nitrogen flow. The carbonized sample was soaked in 2 M KOH for 2 h, then washed with up water until neutral. Subsequently, it was soaked in 2 M HCl (36.0~38.0%, GR) for 2 h, washed with up water to neutrality, and dried overnight at 80 °C in a drying oven to obtain the sample (PN-1M-Co). Control samples etched with 0 M, 0.5 M, 1 M, and 2 M KOH solutions were prepared by the same method, except that no K<sub>3</sub>[Co(CN)]<sub>6</sub> was added (designated as PN, PN-0.5M, PN-1M, and PN-2M, respectively).

S@PN-1M-Co was obtained by a two-step melt synthesis method.<sup>1</sup> High-purity sulfur (S, 99.99%, Aladdin) and PN-1M-Co were mixed in a mass ratio of 2:3, transferred into a polytetrafluoroethylene (PTFE) liner in an autoclave filled with argon, and kept at 155 °C for 12 h and then at 200 °C for 2 h and cooled to ambient temperature to form S@PN-1M-Co. The preparation process of S@PN, S@PN-0.5M, S@PN-1M, and S@PN-2M were similar to that of S@PN-1M-Co except that PN-1M-Co was replaced by PN, PN-0.5M, PN-1M, and PN-2M, respectively.

## 1.2. Characterization

The morphology and microstructure of the samples were characterized by using a field emission scanning electron microscope (SEM, Carl Zeiss AG, Gemini300) equipped with an energy dispersive spectroscopy (EDS). XRD patterns of all samples were analyzed by a powder X-ray diffractometer (XRD, SmartLab SE, Rigaku). The surface state of the composite was characterized using X-ray photoelectron spectrometer (XPS, Thermo Scientific K-Alpha, America). Fourier transform infrared spectroscopy (FTIR, Thermo Scientific Nicolet iS10) was measured in the wavelength range of 600  $\text{cm}^{-1}$  to 4,000  $\text{cm}^{-1}$ . The TEM analyzed the morphology of PN-1M-Co and PN-1M. (TEM, Tecnai F20, FEI). The sulfur content was monitored by Thermogravimetric analysis (TG, HITACHI STA200, Japan) under an Ar atmosphere from 25 to 800 °C at a heating rate of 10 °C  $\text{min}^{-1}$ . The nitrogen adsorption-desorption isotherms of the samples were obtained using an Autosorb-iQ automated surface area and porosity analyzer (Quantachrome, America).

## 1.3. Electrochemical Measurements

The active materials, PVDF and Super-P were mixed in N-Methyl-2-pyrrolidone (NMP, 99%, Aladdin) at a mass ratio of 7:1.5:1.5 and stirred to obtain a uniform slurry. Then the prepared slurry is coated on the carbon-coated aluminum foil, vacuum-dried at 60 °C overnight and cut into discs with a diameter of 12 mm. The sulfur mass loading was about 1  $\text{mg cm}^{-2}$ . CR2032 coin cells were assembled in Ar-filled glove box ( $\text{H}_2\text{O}$  and  $\text{O}_2$  <0.01 ppm). Glass fiber (Whatman, GF/F) was used as the separator with metallic sodium as anode. The electrolyte was 1 M  $\text{NaPF}_6$  in EC: DEC (1:1 vol%) with 5 wt% FEC. The amount of electrolyte added was 100  $\mu\text{L}$ , and the sodium foil diameter

was 15.6 mm. The electrolyte-to-sulfur (E/S) ratio is about 30  $\mu\text{L mg}^{-1}$  for a 4.93 mg sulfur cathode. The cycle performance of the cell was tested using LAND and Neware equipment with a voltage range of 0.5~2.8 V. The cycle voltammetry (CV) measurements were carried out using an electrochemical workstation (CHI 660C, China) at a selected scan rate of 0.1  $\text{mV s}^{-1}$ . The electrochemical impedance spectroscopy experiment (EIS) was conducted over a frequency range of 0.1~10<sup>6</sup> Hz. The galvanostatic intermittent titration technique (GITT) was performed on LAND equipment with a 10 min current pulse at 0.1 C followed by 1 h relaxation. Electrochemical testing was conducted at a controlled temperature of 25°C unless noted otherwise.

#### **1.4. Na<sub>2</sub>S<sub>6</sub> Visualized Adsorption Tests**

The Na<sub>2</sub>S<sub>6</sub> solution was prepared by dissolving Na<sub>2</sub>S and sulfur (a molar ratio of 1:5) in appropriate amount of DME and stirring at 60 °C for 6 h to form a homogeneous dark brown solution. The obtained Na<sub>2</sub>S<sub>6</sub> needed to be further dilution (0.1 M) before adsorption experiments. Then, the same amount of samples were dispersed into the diluted Na<sub>2</sub>S<sub>6</sub> solution and rested for 6 h. The measurement of ex situ UV-vis absorption spectra was performed after the samples (PN、PN-0.5M、PN-1M、PN-2M and PN-1M-Co) soaked in the Na<sub>2</sub>S<sub>6</sub> solution for 12 h. The whole testing process was carried out in a glove box filled with argon gas.

#### **1.5. Measurement for the Na<sub>2</sub>S Precipitation Experiments**

The Na<sub>2</sub>S precipitation experiments were tested on the CR2032 type coin batteries. The tested electrode was prepared by PN-1M (or PN-1M-Co) with PVDF and Super-p in a mass ratio of 7:1.5:1.5 in a certain amount of NMP to obtain a uniformly mixed slurry. Then, it is coated on the carbon-coated aluminum foil and dried at 60 °C for 12 hours. The assembly method for testing the battery with the pure Na as anode, a glass fiber as separator, PN-1M (PN-1M-Co) electrode as cathode, Na<sub>2</sub>S<sub>6</sub> solution (0.1 M, 30  $\mu\text{L}$ ) as electrolyte adding on the cathode side and the DME (60  $\mu\text{L}$ ) solvent dropped on the anode side. The batteries were first discharged galvanostatically to 1.3 V and then kept the constant potential voltage at 1.2 V until the current below 10<sup>-5</sup> A.

#### **1.6. Glass Cells Assemble and Measurement**

The glass cells were assembled by using the S@PN-1M-Co and S@PN-1M electrodes as cathodes and Na metal foil as the anode. Both anode and cathode were clamped by alligator clips, and the electrolyte was 1 M NaPF<sub>6</sub> in EC: DEC (1:1 vol%) with 5 wt% FEC. Finally, the reaction vessel was sealed and taken out of the glove box for galvanostatic charge-discharge test at 0.1 C on LAND test system.

### 1.7. DFT calculations

All of the first principle calculations were based on the Vienna Ab initio Simulation Package (VASP).<sup>2</sup> The interaction between ions and valence electrons was described by Projected Augmented Wave (PAW)<sup>3</sup>, and the exchange-correlation interaction was described by the Perdew-Burke-Ernzerhof generalized gradient approximation (PBE-GGA).<sup>4, 5</sup> The cut-off energy was set as 450 eV, and the convergence criteria for self-consistent electronic energy and residual force were respectively assumed to be 10<sup>-5</sup> eV/atom and 0.02 eV/Å, which could ensure sufficient accuracy. A 6×6 slab with 72 atoms is employed to model graphene. A vacuum region of with a 35 Å vacuum layer was added between periodic slabs. The k points are set 1 × 1 × 1 based on Monkhorst-Pack meshes for all structures. We constructed adsorption models where Na<sub>2</sub>S or Na<sub>2</sub>S<sub>6</sub> were adsorbed on the graphene and Co7@graphene, respectively. The adsorption energy ( $E_{\text{ads}}$ ) is expressed by the equation (1):

$$E_{\text{ads}} = E_{\text{final}} - E_{\text{initial}} - E_{\text{Na}_2\text{S}/\text{Na}_2\text{S}_6}$$

where  $E_{\text{final}}$  and  $E_{\text{initial}}$  refer to the energy before and after adsorption, respectively.

The electron density difference ( $\Delta\rho$ ) is expressed by the equation (2):

$$\Delta\rho = \rho_{AB} - \rho_A - \rho_B$$

Where  $\rho_{AB}$  refer to the charge density of the complex, and  $\rho_A$ ,  $\rho_B$  refer to the charge density of each fragment.

## 2. Result and Discussion

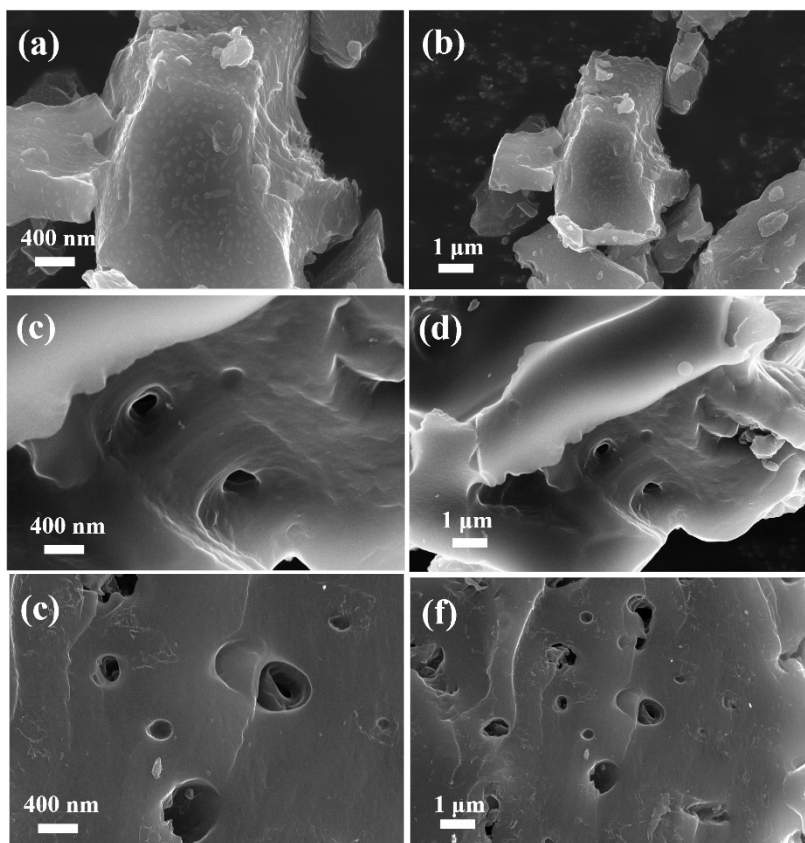

Figure S1. SEM image of (a and b) PN, (c and d) PN-0.5M, (e and f) PN-2M.

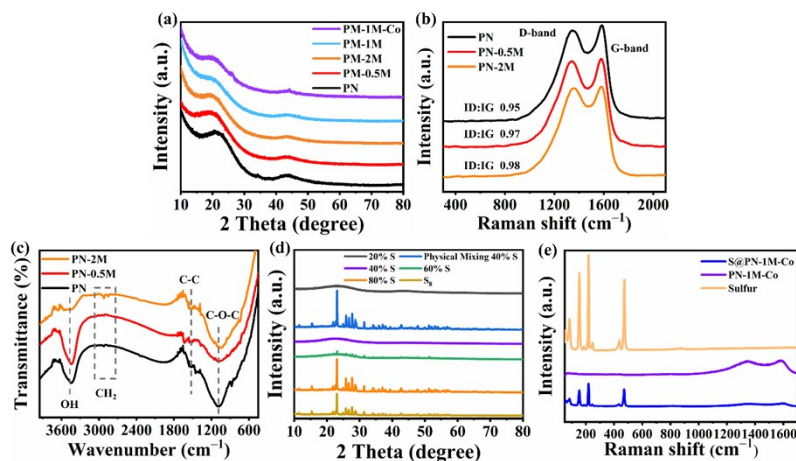

Figure S2. (a) XRD patterns of PN, PN-0.5M, PN-1M, PN-2M and PN-1M-Co. (b) Raman spectra of PN, PN-0.5M and PN-2M. (c) FTIR spectra of PN, PN-0.5M and PN-2M. (d) XRD patterns of the 20%S@PN-1M-Co, Physical Mixing 40%S@PN-1M-Co, 40%S@PN-1M-Co, 60%S@PN-1M-Co, 80%S@PN-1M-Co, and S<sub>8</sub>. (e) Raman spectra of sulfur, PN-1M-Co and S@PN-1M-Co.

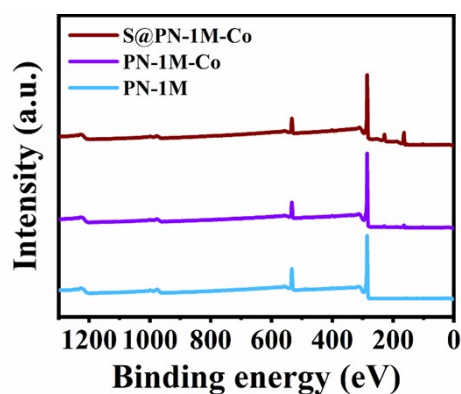

Figure S3. XPS spectra of PN-1M, PN-1M-Co and S@PN-1M-Co.

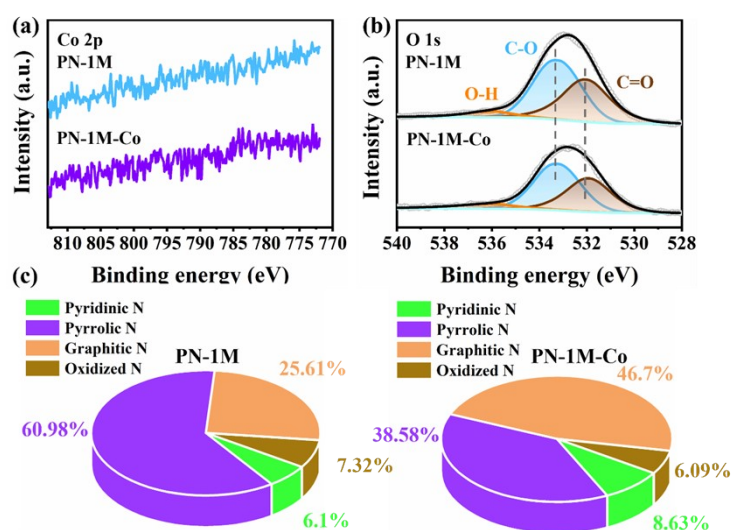

Figure S4. (a) XPS spectra of Co2p for PN-1M-Co and PN-1M. (b) XPS spectra of O1s for PN-1M-Co and PN-1M. (c) Relative proportions of different nitrogen species in PN-1M and PN-1M-Co.

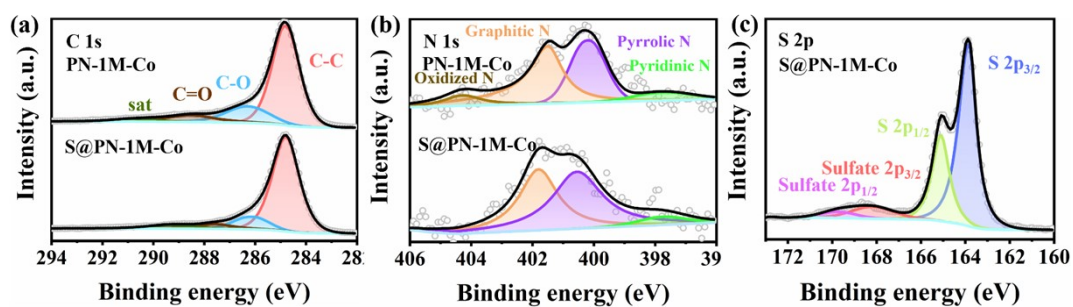

Figure S5. (a) XPS spectra of C1s for S@PN-1M-Co and PN-1M-Co. (b) XPS spectra of N 1s for S@PN-1M-Co and PN-1M-Co. (c) XPS spectra of S 2p for S@PN-1M-Co.

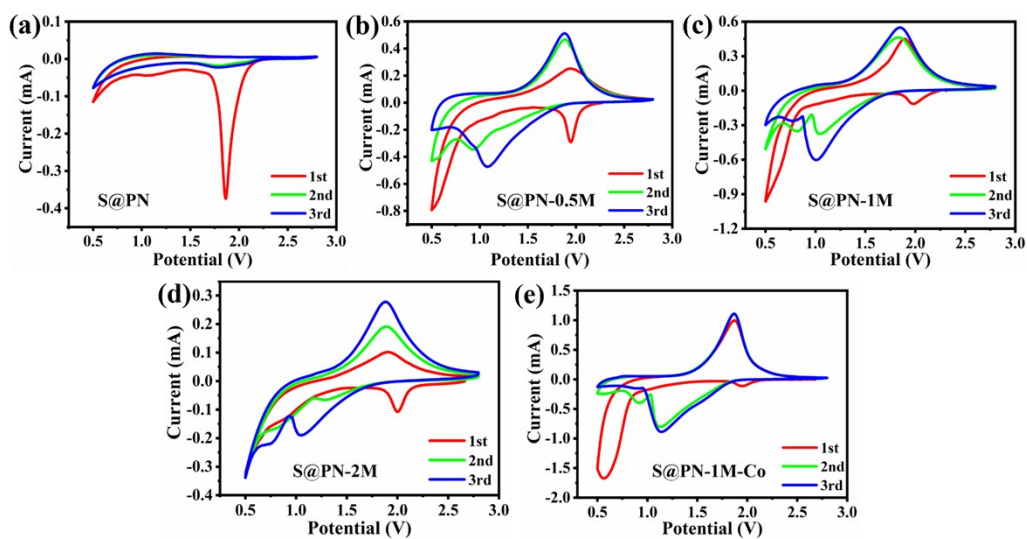

Figure S6. CV curves of (a) S@PN, (b) S@PN-0.5M, (c) S@PN-1M, (d) S@PN-2M, (e) S@PN-1M-Co.

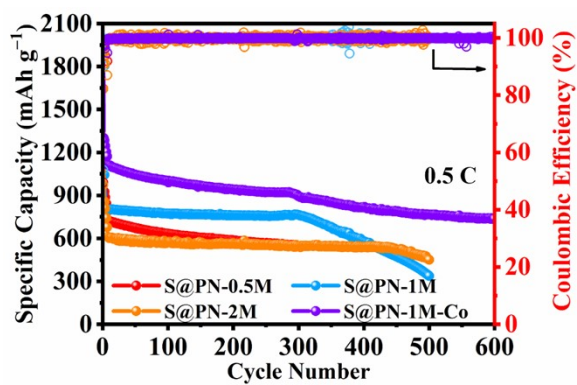

Figure S7. Cyclic performance of S@PN-0.5M, S@PN-1M, S@PN-2M and S@PN-1M-Co electrodes at 0.5 C.



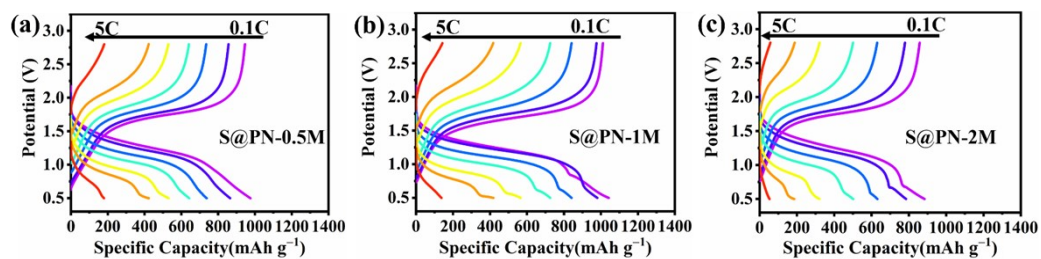

Figure S8. Charge-discharge profiles of (a) S@PN-0.5M, (b) S@PN-1M, (c) S@PN-2M at various current densities of 0.1-5 C.

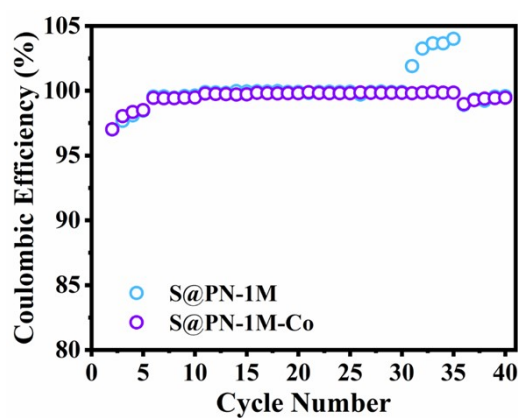

Figure S9. Coulombic efficiency of S@PN-1M and S@PN-1M-Co at 0.1, 1, 2, 3 and 5 C, respectively.

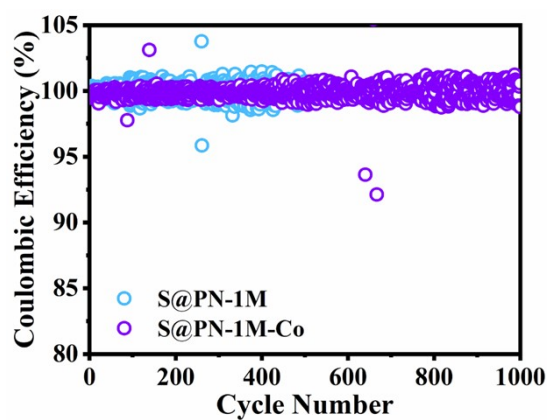

Figure S10. Coulombic efficiency of S@PN-1M and S@PN-1M-Co at 1C, respectively

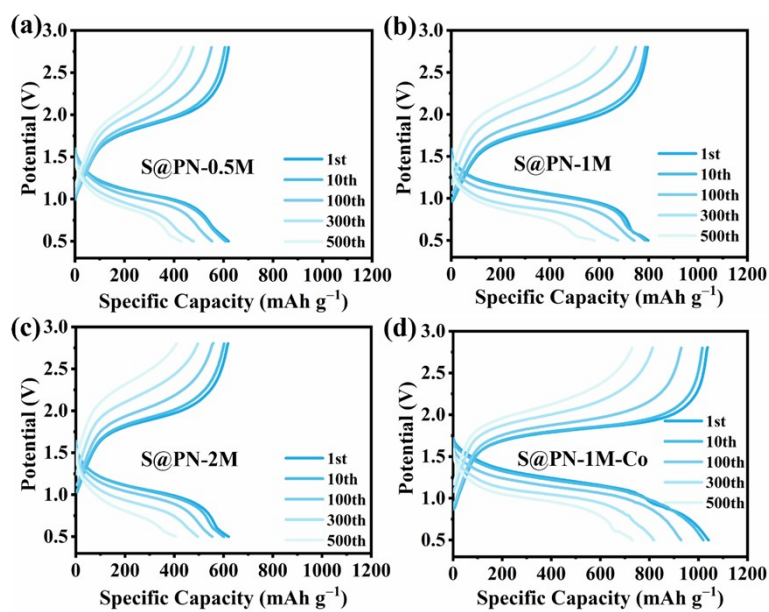

Figure S11. Charge/discharge profiles of (a) S@PN-0.5M, (b) S@PN-1M, (c) S@PN-2M and (d) S@PN-1M-Co at 1.0 C.

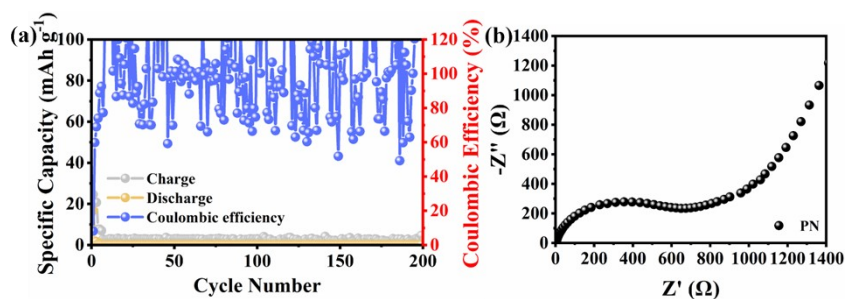

Figure S12. (a) Cyclic performance of S@PN electrodes at 1.0 C. (b) EIS Nyquist plot of S@PN after measurement of rate performance (discharge state).

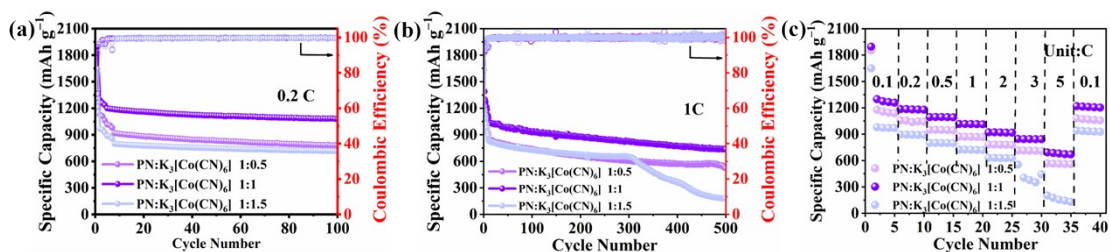

Figure S13. Cyclic performance at different K<sub>3</sub>[Co(CN)<sub>6</sub>] proportions. (a) 0.2C, (b) 1C. (c) Rate performance at different current densities.

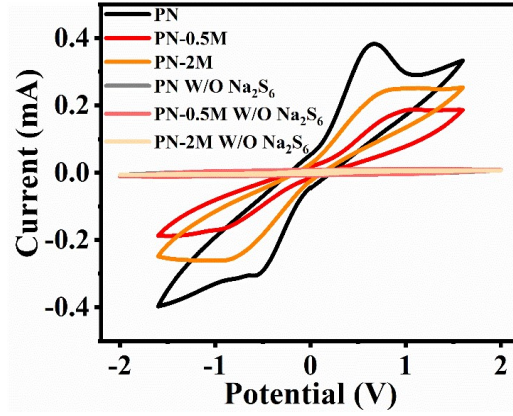

Figure S14. CV curves of symmetrical cells with PN, PN-0.5M and PN-2M.

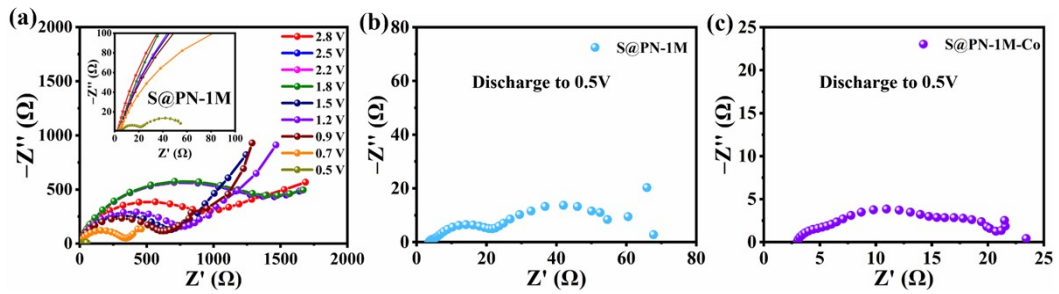

Figure S15. (a) In situ EIS of the S@PN-1M during the discharge process. (b) Nyquist plot of S@PN-1M during discharge to 0.5V. (c) Nyquist plot of S@PN-1M-Co during discharge to 0.5V.

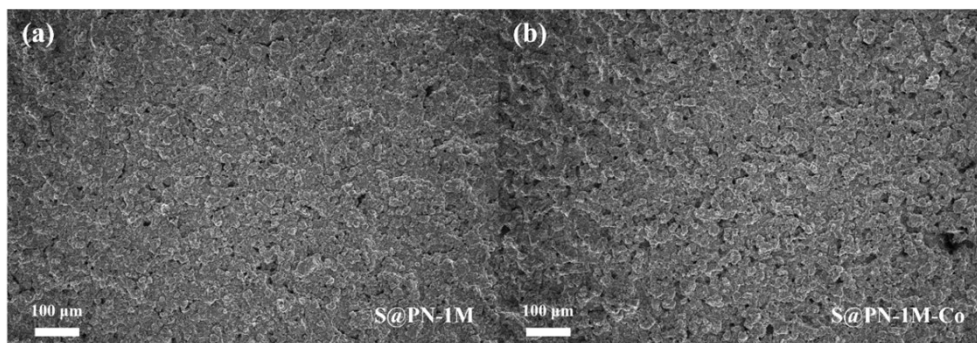

Figure S16. SEM images of (a) S@PN-1M, (b) S@PN-1M-Co pristine cathodes.

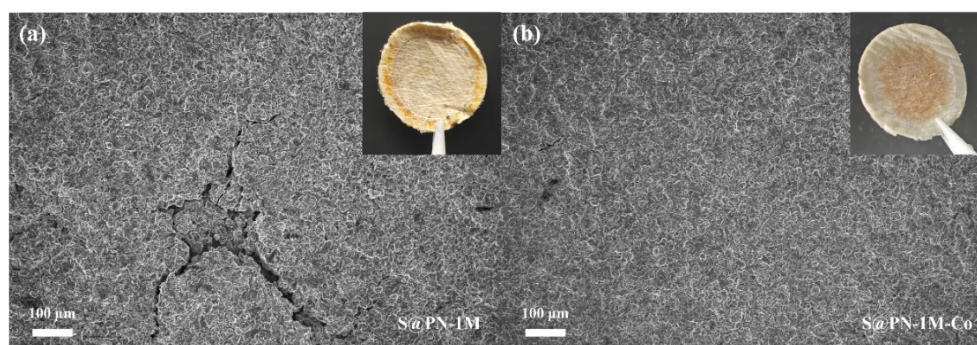

Figure S17. SEM images of (a) S@PN-1M, (b) S@PN-1M-Co cathodes after 500 cycles at 1C. The inset is the separators corresponding digital photo.



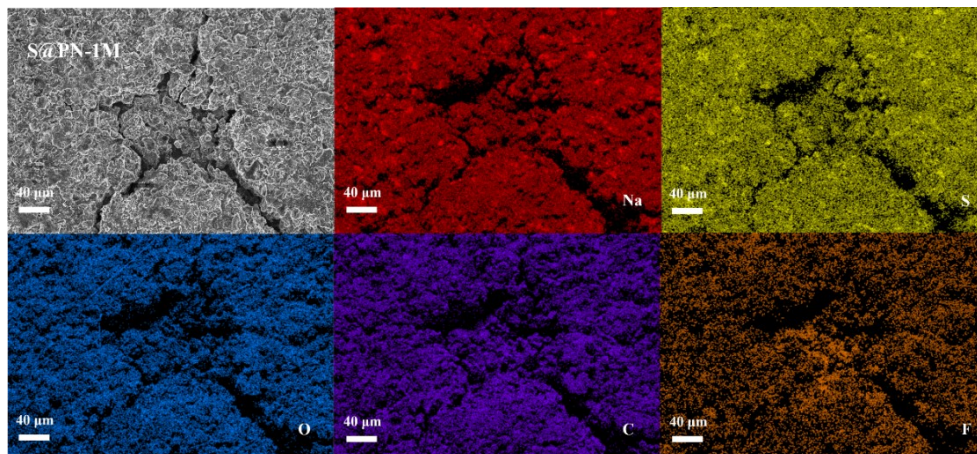

Figure S18. SEM image of S@PN-1M cathode and corresponding EDS mappings of C, O, F, S and Na elements after 500 cycles at 1C.

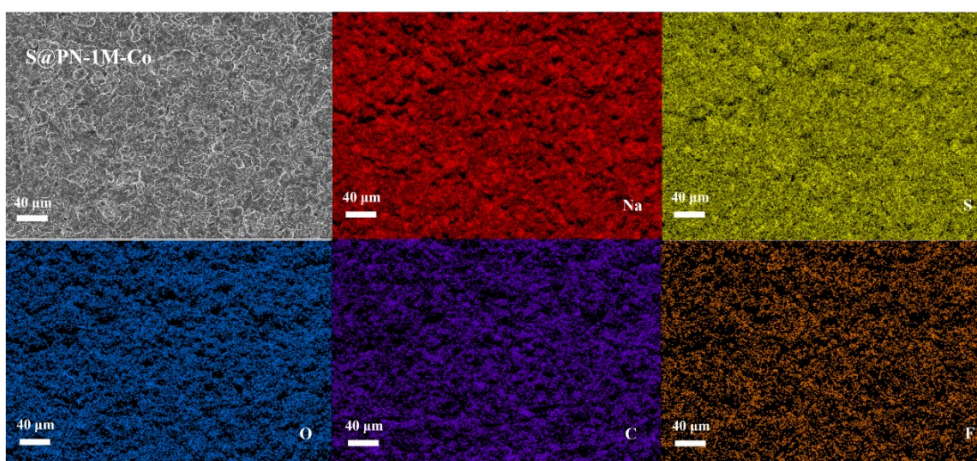

Figure S19. SEM image of S@PN-1M-Co cathode and corresponding EDS mappings of C, O, F, S and Na elements after 500 cycles at 1C.

Table S1. Cathode composition and electrochemical performance of the battery in this work to various cathodes reported in previous literature.

| Cathode                         | Capacity<br>at 0.1C | Capacity<br>at 0.2C | Capacity<br>at 0.5C | Capacity<br>at 1.0C | Capacity<br>at 2.0C | Capacity<br>at 3.0C | Capacity<br>at 5.0C | Sulfur<br>loading<br>density<br>(mg/cm <sup>2</sup> ) | Ref       |
|---------------------------------|---------------------|---------------------|---------------------|---------------------|---------------------|---------------------|---------------------|-------------------------------------------------------|-----------|
| S@PN-1M-Co                      | 1264.7              | 1182.3              | 1094.5              | 1014.7              | 919                 | 843.5               | 679.6               | 1.0                                                   | This work |
| WBM@S                           | 1286.5              | 1077                | 795                 | 601                 | /                   | 472                 | /                   | 1.0                                                   | 6         |
| S@CNT/NPC                       | 866                 | 756                 | 640                 | 454                 | /                   | /                   | /                   | /                                                     | 7         |
| S@NPC-700                       | 800                 | 686                 | 618.8               | 496                 | 280.9               | /                   | /                   | 0.7                                                   | 8         |
| CN/Au/S                         | 830                 | 755                 | 678                 | 599                 | /                   | /                   | /                   | 0.9                                                   | 9         |
| APCF-38S                        | 1074                | 919                 | 726                 | 600                 | 374                 | /                   | /                   | /                                                     | 10        |
| S/YS-Fe <sub>2</sub> N@NC       | /                   | /                   | 725                 | 620                 | 488                 | 422                 | /                   | /                                                     | 11        |
| S/phos-C                        | 1034                | 938                 | 809                 | 711                 | 568                 | /                   | /                   | /                                                     | 12        |
| RGO/SiO <sub>2</sub> /S         | 750                 | 586                 | 320                 | 185                 | /                   | /                   | /                   | 0.79                                                  | 13        |
| S@Co/C/rGO                      | 461                 | 209                 | 164                 | 150                 | /                   | /                   | /                   | /                                                     | 14        |
| S@WCG                           | 1154                | /                   | 903                 | 712                 | /                   | /                   | /                   | 0.7~0.8                                               | 15        |
| 2D/3D Co <sub>4</sub> N-NC@CC-S | /                   | /                   | 823                 | 711                 | 528                 | 466                 | /                   | /                                                     | 16        |

## Reference

1. Z. Shi, T. Wang, Z. Shi, S. Cui, Z. Zhang, W. Liu and Y. Jin, *Chem. Eng. J.*, 2023, **457**, 141264.
2. G. Kresse and J. Furthmüller, *Physical Review B*, 1996, **54**, 11169-11186.
3. P. E. Blöchl, *Physical Review B*, 1994, **50**, 17953-17979.
4. J. P. Perdew, K. Burke and M. Ernzerhof, *Phys. Rev. Lett.*, 1996, **77**, 3865-3868.
5. J. P. Perdew, K. Burke and Y. Wang, *Physical Review B*, 1996, **54**, 16533-16539.
6. D. Zhao, S. Ge-Zhang, Z. Zhang, H. Tang, Y. Xu, F. Gao, X. Xu, S. Liu, J. Zhou, Z. Wang, Y. Wu, X. Liu and Y. Zhang, *ACS Appl. Mater. Interfaces*, 2022, **14**, 54662-54669.
7. T. Yang, W. Gao, B. Guo, R. Zhan, Q. Xu, H. He, S.-J. Bao, X. Li, Y. Chen and M. Xu, *Journal of Materials Chemistry A*, 2019, **7**, 150-156.

8. J. Mou, T. Liu, Y. Li, W. Zhang, M. Li, Y. Xu, J. Huang and M. Liu, *Journal of Materials Chemistry A*, 2020, **8**, 24590-24597.
9. N. Wang, Y. Wang, Z. Bai, Z. Fang, X. Zhang, Z. Xu, Y. Ding, X. Xu, Y. Du, S. Dou and G. Yu, *Energy & Environmental Science*, 2020, **13**, 562-570.
10. Q. Guo, S. Sun, K.-i. Kim, H. Zhang, X. Liu, C. Yan and H. Xia, *Carbon Energy*, 2021, **3**, 440-448.
11. M. K. Aslam, T. Hussain, H. Tabassum, Z. Wei, W. Tang, S. Li, S.-j. Bao, X. S. Zhao and M. Xu, *Chem. Eng. J.*, 2022, **429**, 132389.
12. Y. Wang, Y. Wang, C. Xu, Y. Meng, P. Liu, C. Huang, L. Yang, R. Li, S. Tang, J. Zeng and X. Wang, *ACS Nano*, 2024, **18**, 3839-3849.
13. Samriddhi, A. Patel, A. Tiwari, S. P. Singh, V. Yadav, R. K. Tiwari and R. K. Singh, *Journal of Energy Storage*, 2024, **99**, 113260.
14. Q. Ma, G. Du, B. Guo, W. Tang, Y. Li, M. Xu and C. Li, *Chem. Eng. J.*, 2020, **388**, 124210.
15. Y. Liu, D. J. Lee, H.-J. Ahn, S. Y. Nam, K.-K. Cho and J.-H. Ahn, *Renewable Energy*, 2023, **212**, 865-874.
16. Y. Li, X. Wang, M. Sun, L. Ai, L. Qin, Z. Zhao and J. Qiu, *Electrochim. Acta*, 2023, **451**, 142288.
